# Supplementary material for: Phase-transition-induced dynamic surface wrinkle pattern on gradient photo-crosslinking liquid crystal elastomer
Source: PubMed Central journal article supplement — Nat Commun. 2024 Dec 30;15:10821. doi: 10.1038/s41467-024-55180-3 (PMC11686167; doi:10.1038/s41467-024-55180-3), 2024-12-30
Supplement: 41467_2024_55180_MOESM2_ESM.pdf [file 41467_2024_55180_MOESM2_ESM.pdf]

## **Description of Additional Supplementary Files**

**File Name: Supplementary Movie 1**

**Description:** Fabricating Wrinkle Pattern on AnLCE Surface

**File Name: Supplementary Movie 2**

**Description:** Manipulation of Wrinkle Surface

**File Name: Supplementary Movie 3**

**Description:** Mechanism for Dynamic Surface Wrinkle Pattern

**File Name: Supplementary Movie 4**

**Description:** Polarized Optical Sight of Patterned AnLCE Surface

**File Name: Supplementary Movie 5**

**Description:** Dynamic Encryption and Decryption of Patterned AnLCE Surface
